# Supplementary material for: High viral abundance as a consequence of low viral decay in the Baltic Sea redoxcline
Source: PubMed Central journal article supplement (PMC5464540; doi:10.1371/journal.pone.0178467), 2017-06-08
Supplement: pone.0178467.s006.pdf [file pone.0178467.s006.pdf]

**Table S3. Variation partitioning of FIC and VP based on nutrient concentrations and water masses**

| Parameters                             | Undiluted<br>FIC and VP |          | Virus dilution<br>FIC and VP |          |
|----------------------------------------|-------------------------|----------|------------------------------|----------|
|                                        | Fraction                | <i>p</i> | Fraction                     | <i>p</i> |
| Nutrients and water mass               | 81                      | 0.2536   | 93                           | 0.0455   |
| Nutrients not corrected for water mass | 62                      | 0.1644   | 75                           | 0.0598   |
| Water mass not corrected for nutrients | 62                      | 0.0759   | 52                           | 0.1294   |
| Nutrients                              | 19                      | 0.5209   | 41                           | 0.0313   |
| Water mass correlated nutrients        | 43                      | n.a.     | 34                           | n.a.     |
| Water mass                             | 19                      | 0.3489   | 18                           | 0.1521   |
| Unexplained                            | 19                      | n.a.     | 7                            | n.a.     |

The table gives the fraction (%) of the variation of the frequency of infected cells (FIC) and virus production (VP) explained by the specific model and its corresponding *p*-value (n.a.: not applicable). The concentrations of NO<sub>2</sub>, NH<sub>4</sub>, and PO<sub>4</sub> served as explanatory variables, collectively referred to as nutrients. The matrix of conditional variables consisted of temperature and salinity, representative of the sampled water mass. Results are considered significant at  $p \leq 0.05$ .
